# Supplementary material for: Subtype recognition and identification of a prognosis model characterized by antibody-dependent cell phagocytosis-related genes in breast cancer
Source: Aging (Albany NY). 2024 Feb 22;16(4):4014–32. doi: 10.18632/aging.205575 (PMC10929816; doi:10.18632/aging.205575)
Supplement: Supplementary Table 1 [file aging-16-205575-s001.xlsx]

## Sheet: supplymentary tableS1
Supplementary Table 1. Results of single factor regression analysis.
gene	HR	HR.95L	HR.95H	pvalue
HMGB2	0.831969	0.702829	0.984838	0.0325586
SLA	0.790819	0.647352	0.966082	0.0215722
TMOD1	1.50721	1.26206	1.79997	5.9e-06
RAC2	0.754165	0.64737	0.878577	0.000292784
CNTFR	1.14709	1.04145	1.26345	0.00536967
PICALM	1.65604	1.21576	2.25575	0.00137922
RAP1GAP2	1.36674	1.11448	1.67611	0.00269049
NLRC3	0.694793	0.500818	0.963898	0.0292497
RHOH	0.829849	0.708077	0.972564	0.0212477
ARRDC3	1.22043	1.03885	1.43374	0.015362
MRPL40	0.726287	0.545719	0.966602	0.0283158
COX5B	0.700887	0.550878	0.891744	0.00382285
BCL9	0.776104	0.623647	0.965831	0.0231146
FOXO1	1.24991	1.04715	1.49194	0.0135071
GMDS	0.777015	0.623028	0.969061	0.0251658
NDUFB7	0.782	0.637455	0.95932	0.0183614
FBRS	0.681813	0.50235	0.925388	0.0139903
SHQ1	0.578817	0.398072	0.841631	0.00420111
IRF2	0.51843	0.365088	0.736178	0.000240792
TTC39C	0.657003	0.506432	0.852341	0.00156167
CS	1.77195	1.28618	2.44118	0.000466116
NDUFS1	1.57936	1.11803	2.23104	0.00951563
BLNK	0.741406	0.613139	0.896505	0.00202034
FDX1	1.33546	1.0461	1.70485	0.0202498
CLIC4	1.38916	1.12483	1.71561	0.00227104
FCRL3	0.709098	0.504372	0.996923	0.0479635
MAP3K3	1.60823	1.1983	2.1584	0.00155085
MUC1	0.885688	0.820767	0.955744	0.0017758
NFKB2	0.706014	0.560828	0.888785	0.00303965
MAML2	1.16261	1.01001	1.33827	0.0358443
ZEB2	1.43366	1.15945	1.77272	0.000881341
ZBTB16	1.2315	1.0568	1.43508	0.00763616
TLE3	0.661391	0.525073	0.833098	0.000447093
CCNT1	1.44267	1.04204	1.99733	0.0272378
DUSP22	1.36017	1.00696	1.83727	0.0449408
MRPL24	0.754978	0.61178	0.931695	0.00881131
CCDC88C	0.645075	0.508072	0.819021	0.000319503
ARID1B	1.73328	1.22261	2.45725	0.00201096
ZDBF2	1.4171	1.09894	1.82738	0.00720566
SSR4	0.761057	0.613356	0.944327	0.0131266
PARS2	0.649982	0.453831	0.930913	0.0187448
PDSS2	1.35071	1.05998	1.72118	0.0150592
HIC1	1.36147	1.03137	1.79722	0.0294051
CLIC2	1.22385	1.01917	1.46964	0.0305152
YPEL5	1.77613	1.14552	2.7539	0.0102557
IER5L	0.832154	0.698735	0.991049	0.0393211
VSIG8	2.53614	1.34242	4.79137	0.00414129
GFI1	0.632203	0.43834	0.911805	0.0141235
NANS	0.70391	0.550931	0.899368	0.0049802
KLHL36	1.60343	1.21939	2.10842	0.000725142
PTPN6	0.660856	0.526402	0.829652	0.000358264
SREBF1	0.824223	0.714025	0.951427	0.00829236
FKBP11	0.715664	0.563285	0.909265	0.00616989
ZNF746	0.600489	0.367604	0.980912	0.0416566
RUVBL1	0.683991	0.522938	0.894644	0.00555943
MAP1B	1.30154	1.11376	1.521	0.000915864
DEFB1	1.11759	1.03187	1.21042	0.00632068
TMEM147	0.66912	0.517793	0.864672	0.00212975
RABEP2	0.757964	0.615523	0.933368	0.00907501
FBXW7	1.45563	1.05056	2.01687	0.0240445
SORD	0.84692	0.722124	0.993282	0.0410682
RDX	1.43098	1.15891	1.76691	0.00086625
THSD7A	1.72689	1.25981	2.36715	0.000685377
PRKCD	0.730819	0.576981	0.925676	0.00931169
ZEB1	1.20855	1.00051	1.45985	0.0493872
SPIB	0.797788	0.653944	0.973272	0.0259448
GMIP	0.645754	0.495471	0.841619	0.00121348
PWWP2B	0.779874	0.629191	0.966643	0.0232274
BTBD19	1.70851	1.25565	2.32469	0.000652511
IRX5	0.823939	0.713134	0.95196	0.00858671
MLYCD	1.99608	1.20087	3.31788	0.00767598
CHAF1A	0.75228	0.588633	0.961422	0.0229482
VPS37C	0.700813	0.537741	0.913338	0.00851959
PCSK7	2.19301	1.4978	3.2109	5.42e-05
FOXO4	1.30674	1.03626	1.64782	0.0237617
PRDM1	0.778285	0.618891	0.97873	0.0320456
ITGB2	0.865206	0.750495	0.997451	0.0460289
FGD3	0.792909	0.702394	0.895088	0.000175382
SIAH2	0.68953	0.588302	0.808176	4.45e-06
SPTBN1	1.31047	1.11453	1.54084	0.00106674
RUNX1T1	1.76268	1.30175	2.38683	0.000247303
MYCBP2	1.25242	1.02365	1.53232	0.0287347
PMAIP1	0.81987	0.71403	0.941399	0.00485859
GDPGP1	0.365356	0.222585	0.599706	6.83e-05
PTPMT1	0.648665	0.454434	0.925913	0.0171297
DGKB	2.75777	1.07509	7.0741	0.0348066
EVL	0.804528	0.706876	0.91567	0.000986495
MS4A8	0.783184	0.618037	0.99246	0.0431138
BCLAF1	1.64288	1.15217	2.34259	0.00609907
HDGF	0.73471	0.586943	0.919679	0.00712801
VPS72	0.752821	0.572094	0.990639	0.042651
HAUS1	0.741109	0.573354	0.957947	0.0221337
NDUFAF3	0.715988	0.558852	0.917307	0.00822447
LCK	0.852525	0.731298	0.993848	0.0414678
SS18	0.633559	0.434424	0.923974	0.0177552
NDUFB4	0.746244	0.567436	0.981397	0.0362308
SIX4	0.736827	0.604187	0.898586	0.00256162
COPG1	0.629952	0.457518	0.867374	0.00462706
FEZ2	1.62255	1.13668	2.31611	0.00768696
CEACAM20	4.97113	1.14334	21.614	0.0324677
SEMA4A	0.806232	0.659263	0.985964	0.0359381
NACC2	1.39696	1.05857	1.84353	0.0181708
COX20	0.555171	0.384985	0.800589	0.00162857
CPLX2	1.18131	1.04435	1.33623	0.00804378
NDUFB10	0.731481	0.575783	0.929281	0.0104497
YBEY	0.682131	0.519556	0.895578	0.00588834
GSK3A	0.690231	0.478584	0.995476	0.0472299
DOCK11	1.29393	1.11705	1.49881	0.000590519
ZNF683	0.774168	0.627689	0.954829	0.0167614
SLC29A2	0.810766	0.662295	0.992522	0.0420829
TMEM101	0.827928	0.716306	0.956944	0.0106008
GNE	1.30276	1.05618	1.6069	0.0134923
IKZF3	0.805959	0.680335	0.954779	0.0125876
HIVEP2	1.38318	1.08509	1.76317	0.00880978
TNFRSF21	1.18815	1.02384	1.37884	0.0231963
C5AR1	1.21452	1.01424	1.45435	0.0345342
SYT1	0.889919	0.799914	0.990051	0.0320526
SLA2	0.78169	0.62404	0.979166	0.0321
CIT	0.691986	0.536726	0.892158	0.00450813
ARPC3	0.700956	0.506785	0.969522	0.0317936
MOSPD1	1.56007	1.09619	2.22026	0.0135094
SLC38A2	1.35771	1.04001	1.77246	0.024548
CD19	0.753038	0.586725	0.966494	0.0259059
SHOX	75.5417	3.76506	1515.66	0.00470708
ZCCHC14	1.59002	1.15134	2.19585	0.00486866
KDELR3	0.849498	0.726756	0.992971	0.0405051
ANAPC11	0.681078	0.548951	0.845006	0.00048217
ARHGEF1	0.690891	0.532749	0.895976	0.00530012
STUB1	0.79203	0.638111	0.983075	0.0344475
ELAVL1	0.566804	0.364174	0.882178	0.0118906
