# Supplementary material for: Subtype recognition and identification of a prognosis model characterized by antibody-dependent cell phagocytosis-related genes in breast cancer
Source: Aging (Albany NY). 2024 Feb 22;16(4):4014–32. doi: 10.18632/aging.205575 (PMC10929816; doi:10.18632/aging.205575)
Supplement: Supplementary Table 2 [file aging-16-205575-s002.xlsx]

## Sheet: Sheet1
Supplementary Table 2. Results of gene differential expression analysis.
gene	logFC	AveExpr	t	P.Value	adj.P.Val	B	change
MAML2	-1.32894	2.20985	-28.2586	9.31692e-130	1.09748e-125	285.613	DOWN
CYRIA	-1.007	1.81146	-28.2568	9.5987e-130	1.09748e-125	285.584	DOWN
FMNL2	-1.14217	2.57971	-27.2476	7.51538e-123	6.44463e-119	269.772	DOWN
EGFR	-1.69027	2.01689	-26.8391	4.53026e-120	3.10785e-116	263.395	DOWN
RNF145	-1.1403	3.31825	-26.2194	7.26212e-116	4.15163e-112	253.751	DOWN
ACSL4	-1.05673	2.749	-25.4966	5.51845e-111	1.89288e-107	242.556	DOWN
TPRN	1.13683	2.77613	25.4585	9.9562e-111	3.10462e-107	241.968	UP
SMIM22	1.89401	4.13328	25.3256	7.79587e-110	2.22838e-106	239.918	UP
NCOA7	-1.2499	2.74525	-25.2429	2.80536e-109	7.40205e-106	238.643	DOWN
PIERCE1	1.20316	2.19603	24.2305	1.6519e-102	2.83309e-99	223.115	UP
PRNP	-1.23365	4.92054	-23.8205	8.70861e-100	1.35779e-96	216.872	DOWN
LRRC56	1.02661	1.90276	23.7626	2.10212e-99	3.13499e-96	215.994	UP
NME3	1.24996	4.79105	23.7441	2.79066e-99	3.98844e-96	215.712	UP
MRAS	-1.26096	2.69529	-23.6397	1.36709e-98	1.8757e-95	214.129	DOWN
MID1	-1.03226	1.24498	-23.4873	1.38774e-97	1.83081e-94	211.821	DOWN
SIGIRR	1.00886	3.52527	23.2641	4.09468e-96	5.01613e-93	208.45	UP
MET	-1.36759	2.08931	-23.1587	2.01961e-95	2.16483e-92	206.86	DOWN
CHST3	-1.12034	2.18148	-22.9583	4.17238e-94	4.08905e-91	203.844	DOWN
ZMYND10	1.32316	1.70892	22.9299	6.40278e-94	6.10061e-91	203.418	UP
DMD	-1.03682	1.00975	-22.6539	4.08077e-92	3.41401e-89	199.28	DOWN
NECAB3	1.028	3.17292	22.592	1.03395e-91	8.44415e-89	198.354	UP
FAM171A1	-1.32836	2.50812	-22.5309	2.58362e-91	2.01411e-88	197.442	DOWN
NFIB	-1.51843	3.31899	-22.4881	4.9066e-91	3.50627e-88	196.803	DOWN
FAT1	-1.31304	3.24922	-22.4648	6.95938e-91	4.87171e-88	196.455	DOWN
ANXA1	-1.4848	4.94117	-22.3794	2.49952e-90	1.71472e-87	195.181	DOWN
GAMT	1.47807	3.66967	22.3161	6.44078e-90	4.24856e-87	194.238	UP
DEGS2	1.90723	3.27363	22.2645	1.39436e-89	8.81886e-87	193.469	UP
KLHDC9	1.19448	2.48667	22.2635	1.41406e-89	8.81886e-87	193.455	UP
SFRP1	-2.93333	3.83187	-22.0353	4.25289e-88	2.43131e-85	190.065	DOWN
KCNJ11	1.28035	2.2491	21.8798	4.29328e-87	2.23127e-84	187.763	UP
SIRPA	-1.00149	3.5749	-21.8569	6.0309e-87	3.04215e-84	187.424	DOWN
RARA	1.1582	4.36937	21.6692	9.74223e-86	4.28421e-83	184.654	UP
C5AR2	1.1055	1.68374	21.6677	9.95501e-86	4.32236e-83	184.632	UP
CD2BP2-DT	1.02059	2.29194	21.5525	5.46795e-85	2.28727e-82	182.936	UP
RAB26	1.21763	1.85609	21.5492	5.73713e-85	2.37095e-82	182.888	UP
AMOTL1	-1.03095	2.45443	-21.5431	6.27877e-85	2.56391e-82	182.798	DOWN
TJP3	1.20458	3.53931	21.5268	7.99258e-85	3.22534e-82	182.558	UP
TRIM2	-1.22764	2.221	-21.5107	1.01406e-84	3.99808e-82	182.321	DOWN
RNF150	-1.01361	1.10418	-21.4053	4.79743e-84	1.82841e-81	180.773	DOWN
GATA3	2.16889	6.66471	21.3732	7.6996e-84	2.87069e-81	180.302	UP
PRR15	1.86835	3.48709	21.1599	1.76987e-82	6.07083e-80	177.18	UP
STARD10	1.545	5.14834	21.1566	1.85775e-82	6.30919e-80	177.132	UP
MLPH	1.98425	4.67926	21.1237	3.00653e-82	1.00123e-79	176.652	UP
PCP2	1.26198	1.74483	21.0848	5.31986e-82	1.72148e-79	176.084	UP
AGR3	3.08479	4.99429	21.0232	1.31036e-81	4.16174e-79	175.186	UP
CELF2	-1.00712	2.05762	-21.0174	1.4265e-81	4.48901e-79	175.102	DOWN
ESR1	2.41836	4.09962	20.8611	1.39921e-80	4.21004e-78	172.828	UP
ANXA9	1.50524	3.96036	20.8596	1.43055e-80	4.26689e-78	172.806	UP
GPM6B	-1.11738	1.82878	-20.7414	8.00638e-80	2.30779e-77	171.091	DOWN
KDM4B	1.03453	3.18117	20.6178	4.83359e-79	1.32638e-76	169.301	UP
PPM1J	1.03874	1.83467	20.6164	4.92879e-79	1.34177e-76	169.281	UP
PLA2G4A	-1.05051	1.39735	-20.6155	4.99971e-79	1.34868e-76	169.267	DOWN
METRN	1.44976	3.28595	20.571	9.53448e-79	2.47759e-76	168.624	UP
CXXC5	1.11581	4.59597	20.383	1.45032e-77	3.6312e-75	165.914	UP
PAFAH1B3	1.14236	5.07972	20.2718	7.22779e-77	1.7098e-74	164.314	UP
CX3CL1	-1.66475	3.31518	-20.2453	1.05848e-76	2.46986e-74	163.935	DOWN
FOXC1	-1.5863	2.10423	-20.2277	1.36395e-76	3.11899e-74	163.682	DOWN
TMC4	1.30775	4.74873	20.1046	8.02655e-76	1.73156e-73	161.917	UP
GPRC5B	-1.03959	2.60176	-20.068	1.35669e-75	2.89042e-73	161.395	DOWN
NFIL3	-1.06435	3.50829	-20.0525	1.69645e-75	3.56993e-73	161.172	DOWN
EVL	1.30228	4.19807	20.0317	2.2858e-75	4.75183e-73	160.875	UP
GNAI1	-1.02761	2.01061	-20.0086	3.18226e-75	6.57558e-73	160.546	DOWN
SYNM	-1.86166	2.63675	-20.0028	3.45945e-75	7.06325e-73	160.463	DOWN
BOC	-1.02226	1.66227	-19.9127	1.25829e-74	2.53887e-72	159.177	DOWN
PRRT3	1.00701	2.10354	19.7791	8.49195e-74	1.64566e-71	157.276	UP
RARRES1	-1.88556	3.34395	-19.7084	2.32725e-73	4.45961e-71	156.272	DOWN
KRT18	1.42031	7.46631	19.6494	5.39138e-73	1.00505e-70	155.436	UP
PSAT1	-1.69812	2.01615	-19.6292	7.18808e-73	1.31849e-70	155.149	DOWN
MISP	1.69033	3.10519	19.5206	3.36272e-72	5.97641e-70	153.613	UP
LDHB	-1.48613	5.49577	-19.517	3.53971e-72	6.25853e-70	153.562	DOWN
GATA3-AS1	1.39675	1.74352	19.4923	5.02066e-72	8.78642e-70	153.214	UP
UBE2E3	-1.01022	3.56947	-19.4848	5.588e-72	9.71483e-70	153.108	DOWN
MAGED2	1.21561	7.59544	19.4845	5.60781e-72	9.71483e-70	153.104	UP
CRYAB	-2.10588	3.76277	-19.4184	1.43137e-71	2.43057e-69	152.171	DOWN
RND3	-1.17437	3.62945	-19.374	2.68354e-71	4.51216e-69	151.546	DOWN
FMO2	-1.5511	1.92334	-19.319	5.83864e-71	9.58235e-69	150.772	DOWN
SIAH2	1.11378	4.98482	19.3177	5.9424e-71	9.70621e-69	150.754	UP
MISP3	1.03038	2.42394	19.3084	6.78228e-71	1.10255e-68	150.623	UP
CREB3L4	1.17648	5.06177	19.2622	1.3005e-70	2.06521e-68	149.974	UP
SLC44A4	2.1481	4.23812	19.2421	1.728e-70	2.7189e-68	149.691	UP
GABRP	-2.68299	2.9077	-19.2175	2.44515e-70	3.81232e-68	149.346	DOWN
HPN	1.50314	3.15322	19.1429	6.98455e-70	1.06954e-67	148.301	UP
SPRY2	-1.11561	2.34081	-19.1343	7.88326e-70	1.19648e-67	148.18	DOWN
NAT1	2.38072	3.83898	19.079	1.71491e-69	2.54646e-67	147.407	UP
KCNK15	1.45442	2.18118	19.078	1.73958e-69	2.57195e-67	147.393	UP
ZG16B	1.68579	4.24615	19.0672	2.02239e-69	2.96453e-67	147.243	UP
ARL4C	-1.00031	3.6906	-19.0494	2.59895e-69	3.7774e-67	146.993	DOWN
S100B	-1.86331	2.10816	-19.0051	4.8362e-69	6.8266e-67	146.375	DOWN
ID4	-1.70321	2.90041	-18.9717	7.71827e-69	1.06706e-66	145.909	DOWN
FOXA1	2.20634	5.3941	18.9463	1.10171e-68	1.4996e-66	145.555	UP
ZNF703	1.57982	5.10091	18.92	1.59101e-68	2.14013e-66	145.189	UP
CAV2	-1.12846	2.42746	-18.9168	1.6639e-68	2.22076e-66	145.145	DOWN
HID1	1.21405	4.32934	18.8737	3.04293e-68	3.9612e-66	144.544	UP
COX6C	1.5774	6.61232	18.8356	5.17679e-68	6.67552e-66	144.015	UP
BBOX1	-1.41946	1.37348	-18.7931	9.36928e-68	1.19028e-65	143.424	DOWN
RCAN1	-1.21153	3.11565	-18.5148	4.47759e-66	5.35143e-64	139.575	DOWN
SLC9A3R1	1.30044	6.73327	18.4072	1.98122e-65	2.26526e-63	138.095	UP
CA12	2.0305	5.02419	18.3155	7.02075e-65	7.79348e-63	136.836	UP
TCEAL3	1.06935	4.05701	18.3055	8.05915e-65	8.88865e-63	136.698	UP
TRIM29	-1.63025	2.12097	-18.2938	9.46833e-65	1.03431e-62	136.538	DOWN
AKR7A3	1.81633	2.81991	18.2864	1.04751e-64	1.13704e-62	136.437	UP
PRR36	1.12355	2.83399	18.2421	1.92634e-64	2.03309e-62	135.831	UP
YBX3	-1.01598	3.72548	-18.2401	1.98172e-64	2.08512e-62	135.803	DOWN
RHPN1	1.06055	3.12088	18.1906	3.91096e-64	4.00447e-62	135.126	UP
SREBF1	1.05242	4.95643	18.1557	6.30536e-64	6.41781e-62	134.651	UP
SPDEF	2.00833	5.75723	18.1448	7.32204e-64	7.43057e-62	134.502	UP
RGS2	-1.4337	3.6617	-17.9897	6.11191e-63	5.85599e-61	132.39	DOWN
TNFRSF21	-1.01581	3.69868	-17.9177	1.63137e-62	1.50424e-60	131.413	DOWN
DDR2	-1.04451	2.54841	-17.9171	1.64369e-62	1.51153e-60	131.406	DOWN
ALDH1A3	-1.04413	1.9037	-17.9099	1.81339e-62	1.66314e-60	131.308	DOWN
LINC02188	-1.21056	0.833493	-17.8702	3.11274e-62	2.80974e-60	130.77	DOWN
FBP1	1.42091	5.08837	17.856	3.77686e-62	3.39136e-60	130.578	UP
PTX3	-1.24164	1.14095	-17.8347	5.04427e-62	4.49412e-60	130.29	DOWN
TSPAN13	1.13405	6.70191	17.8289	5.46086e-62	4.84013e-60	130.211	UP
CELSR1	1.26305	3.78301	17.7707	1.20237e-61	1.04412e-59	129.425	UP
SLC6A14	-1.34656	1.05772	-17.7372	1.89554e-61	1.63364e-59	128.972	DOWN
AGR2	2.67931	6.05545	17.7303	2.07933e-61	1.78308e-59	128.88	UP
TFF3	2.78773	5.56068	17.6682	4.82119e-61	4.08325e-59	128.043	UP
BCAM	1.23058	5.69414	17.6573	5.58616e-61	4.71948e-59	127.897	UP
LINC02613	-1.0949	0.977423	-17.6231	8.87026e-61	7.43909e-59	127.436	DOWN
PKP1	-1.59807	2.04685	-17.5726	1.75261e-60	1.45913e-58	126.759	DOWN
LOXL4	-1.09272	1.39918	-17.5714	1.78197e-60	1.47998e-58	126.742	DOWN
DSC2	-1.15621	2.63388	-17.5418	2.65609e-60	2.17959e-58	126.345	DOWN
HSPB1	1.25071	7.72082	17.5317	3.04349e-60	2.47969e-58	126.209	UP
DNAJC12	1.74752	3.36863	17.3423	3.873e-59	2.97865e-57	123.678	UP
SCCPDH	1.00416	5.14427	17.3383	4.08274e-59	3.12594e-57	123.626	UP
FSIP1	1.47876	1.99338	17.2066	2.37257e-58	1.75391e-56	121.875	UP
FAM107A	-1.17696	1.29078	-17.1851	3.16031e-58	2.31134e-56	121.59	DOWN
VGLL1	-1.66478	1.22485	-17.1137	8.18199e-58	5.83473e-56	120.643	DOWN
HAPLN3	-1.19861	2.52256	-17.1069	8.95525e-58	6.37291e-56	120.553	DOWN
MRC1	-1.02446	1.53824	-17.0529	1.83449e-57	1.29209e-55	119.84	DOWN
MFGE8	-1.19499	4.2953	-17.0308	2.45858e-57	1.71755e-55	119.548	DOWN
PM20D2	-1.00384	1.72929	-17.0293	2.50917e-57	1.74933e-55	119.528	DOWN
LMX1B	1.18717	3.29292	16.9913	4.1472e-57	2.83373e-55	119.028	UP
KIT	-1.55342	2.59997	-16.9394	8.24531e-57	5.53468e-55	118.344	DOWN
DNALI1	1.36823	2.86408	16.9166	1.11544e-56	7.42924e-55	118.044	UP
TTC39A	1.17417	3.39647	16.8745	1.94242e-56	1.28129e-54	117.492	UP
ADGRB2	1.06717	1.94102	16.8398	3.07025e-56	2.00214e-54	117.036	UP
FZD7	-1.02325	3.68326	-16.8198	3.99928e-56	2.58829e-54	116.773	DOWN
ZNF552	1.23714	3.97477	16.815	4.25823e-56	2.74552e-54	116.711	UP
CMBL	1.1672	4.17598	16.7277	1.34176e-55	8.30752e-54	115.569	UP
TPSP2	1.28696	1.31295	16.7012	1.90099e-55	1.16439e-53	115.222	UP
PROM1	-1.80439	2.30853	-16.6955	2.04686e-55	1.2515e-53	115.149	DOWN
PPP1R14C	-1.37475	1.36398	-16.6893	2.2196e-55	1.3523e-53	115.068	DOWN
TCF7L1	-1.09731	2.79339	-16.6703	2.85082e-55	1.71554e-53	114.819	DOWN
IL34	-1.12943	1.94826	-16.6636	3.11099e-55	1.86556e-53	114.732	DOWN
CLMP	-1.00946	2.86186	-16.6627	3.14608e-55	1.88331e-53	114.721	DOWN
AZGP1P1	1.04837	1.67425	16.6382	4.33665e-55	2.56911e-53	114.402	UP
ADAMTS1	-1.18245	2.91059	-16.5589	1.22371e-54	7.06642e-53	113.37	DOWN
STAC2	-2.09853	2.24578	-16.5474	1.42106e-54	8.19222e-53	113.221	DOWN
FBXL16	1.20927	2.6724	16.5171	2.11099e-54	1.1929e-52	112.828	UP
MYB	1.27734	3.64282	16.4999	2.6398e-54	1.47954e-52	112.605	UP
TFF1	3.2466	5.34706	16.4592	4.48579e-54	2.48173e-52	112.078	UP
TSPAN1	1.84945	4.11996	16.4312	6.45978e-54	3.55661e-52	111.715	UP
PADI2	-1.54534	3.15693	-16.4275	6.77461e-54	3.71802e-52	111.668	DOWN
EEF1A2	2.22269	3.95311	16.4184	7.62622e-54	4.17204e-52	111.55	UP
DEPP1	-1.21657	4.49496	-16.3576	1.67866e-53	8.9968e-52	110.765	DOWN
NRN1	-1.02065	2.60831	-16.2276	9.0168e-53	4.70754e-51	109.093	DOWN
REEP6	1.5493	4.04122	16.2148	1.06459e-52	5.53283e-51	108.928	UP
KRT8	1.20313	7.47098	16.2141	1.07374e-52	5.57193e-51	108.919	UP
SLC16A6	1.39442	2.46737	16.1418	2.72465e-52	1.38868e-50	107.993	UP
TGFBR2	-1.03135	4.52261	-16.1338	3.02099e-52	1.53288e-50	107.89	DOWN
ENPP2	-1.15575	2.41612	-16.1147	3.86452e-52	1.95224e-50	107.645	DOWN
MYLK	-1.02532	2.69935	-16.1015	4.5788e-52	2.3029e-50	107.477	DOWN
TINAGL1	-1.08358	2.88122	-16.0921	5.16542e-52	2.58278e-50	107.357	DOWN
SUSD3	1.77486	4.39195	16.0819	5.88929e-52	2.94044e-50	107.226	UP
EDN1	-1.07612	2.50837	-16.0702	6.83799e-52	3.39435e-50	107.078	DOWN
DEFB1	-1.59776	2.03885	-16.0561	8.19926e-52	4.04666e-50	106.897	DOWN
ELF5	-1.70075	1.95411	-16.0205	1.29301e-51	6.32692e-50	106.444	DOWN
CAPN6	-1.31559	1.22649	-16.0033	1.61226e-51	7.85539e-50	106.225	DOWN
FGD3	1.19093	2.81259	15.9318	4.02315e-51	1.93004e-49	105.315	UP
KLF5	-1.16034	2.67154	-15.9201	4.66964e-51	2.23082e-49	105.167	DOWN
CXCL2	-1.19725	1.29911	-15.9065	5.55301e-51	2.6418e-49	104.995	DOWN
CHRDL1	-1.63141	2.13519	-15.8131	1.82518e-50	8.39217e-49	103.811	DOWN
EVA1B	1.15135	3.72703	15.8075	1.95977e-50	8.96296e-49	103.74	UP
CYP2B7P	2.31022	2.78373	15.7967	2.2485e-50	1.02697e-48	103.604	UP
DSC3	-1.29221	1.53941	-15.793	2.35629e-50	1.07478e-48	103.557	DOWN
NKAIN1	1.82637	2.73783	15.7523	3.95036e-50	1.78526e-48	103.043	UP
MAPT	1.3435	2.65851	15.7518	3.97314e-50	1.7932e-48	103.038	UP
KIF12	1.4149	3.01651	15.6833	9.45989e-50	4.1923e-48	102.175	UP
SERPINA11	1.62507	2.22356	15.6815	9.67788e-50	4.28337e-48	102.152	UP
SERPINB5	-1.50685	1.99828	-15.6378	1.68282e-49	7.40029e-48	101.602	DOWN
MT1X	-1.2063	4.00982	-15.6142	2.26704e-49	9.89333e-48	101.306	DOWN
SLC7A8	1.19668	4.15295	15.6132	2.29585e-49	9.99363e-48	101.293	UP
MME	-1.2071	1.96386	-15.5631	4.31293e-49	1.83091e-47	100.666	DOWN
LRG1	1.62104	2.9772	15.561	4.42978e-49	1.87819e-47	100.64	UP
MUC1	1.71722	5.91545	15.5369	5.99898e-49	2.53413e-47	100.338	UP
ABAT	1.15255	2.45742	15.4575	1.62599e-48	6.71157e-47	99.3466	UP
AIF1L	-1.15296	3.20364	-15.4343	2.17405e-48	8.88822e-47	99.0578	DOWN
SOSTDC1	-1.2461	1.25915	-15.3028	1.12467e-47	4.43417e-46	97.4236	DOWN
SLC39A6	1.55227	7.32052	15.2654	1.79189e-47	6.99246e-46	96.9605	UP
H2AJ	1.04782	4.8091	15.2438	2.34471e-47	9.04678e-46	96.6932	UP
CCNP	1.031	1.6134	15.2342	2.64206e-47	1.01712e-45	96.5745	UP
FDCSP	-2.44671	2.64038	-15.2091	3.609e-47	1.37853e-45	96.2644	DOWN
PKIB	1.25832	3.26173	15.1446	8.02658e-47	3.01555e-45	95.4697	UP
ACSL1	-1.0971	4.10684	-15.081	1.76316e-46	6.50304e-45	94.6873	DOWN
PCOLCE2	-1.26279	1.254	-15.0589	2.31559e-46	8.48581e-45	94.4164	DOWN
ARMT1	1.18624	4.72816	15.0189	3.79187e-46	1.37781e-44	93.9261	UP
ANXA3	-1.05533	2.35168	-14.9434	9.59592e-46	3.40382e-44	93.0031	DOWN
CDH3	-1.32414	3.02997	-14.8456	3.18263e-45	1.09716e-43	91.8112	DOWN
TBC1D9	1.43935	5.5845	14.8043	5.27297e-45	1.79078e-43	91.3093	UP
KLK5	-1.79513	2.11425	-14.7129	1.60554e-44	5.35196e-43	90.2026	DOWN
PYCARD	1.0406	4.05888	14.6532	3.31369e-44	1.06826e-42	89.4823	UP
KRT19	1.33055	8.76651	14.6126	5.42216e-44	1.72849e-42	88.9929	UP
LYVE1	-1.07832	1.11902	-14.5085	1.90728e-43	5.90124e-42	87.7428	DOWN
CCDC74A	1.27345	2.79552	14.5083	1.90967e-43	5.90124e-42	87.7416	UP
THSD4	1.16179	2.84263	14.508	1.91701e-43	5.91857e-42	87.7378	UP
FABP7	-1.44184	1.01704	-14.4921	2.32308e-43	7.13376e-42	87.5468	DOWN
LPL	-1.61502	3.02928	-14.4748	2.85864e-43	8.74705e-42	87.3406	DOWN
IL33	-1.18431	2.02633	-14.446	4.04324e-43	1.22407e-41	86.9961	DOWN
KLK6	-1.48517	1.48541	-14.3726	9.75481e-43	2.90704e-41	86.1208	DOWN
HRCT1	-1.16391	1.47771	-14.347	1.32563e-42	3.92663e-41	85.816	DOWN
H2BC5	1.20375	4.9593	14.3409	1.4263e-42	4.22118e-41	85.7433	UP
TF	-1.13126	1.19793	-14.3351	1.52865e-42	4.5163e-41	85.6744	DOWN
SEMA3B	1.03741	2.20952	14.2949	2.47202e-42	7.22871e-41	85.1968	UP
GLYATL2	-1.57258	2.14328	-14.2836	2.82633e-42	8.24372e-41	85.0637	DOWN
KLK7	-1.31323	1.32053	-14.2824	2.86741e-42	8.35641e-41	85.0493	DOWN
C1S	-1.00802	5.48494	-14.2608	3.70891e-42	1.07177e-40	84.7936	DOWN
RET	1.36801	2.38199	14.2549	3.98066e-42	1.14933e-40	84.7233	UP
SCARA5	-1.09963	0.94805	-14.2228	5.8339e-42	1.66757e-40	84.3435	DOWN
PARD6B	1.12125	2.86022	14.1533	1.33189e-41	3.69025e-40	83.5232	UP
MMP7	-1.66078	3.72903	-14.1321	1.71295e-41	4.72693e-40	83.2732	DOWN
SLC34A2	-1.56075	2.02829	-14.0471	4.67914e-41	1.25981e-39	82.2748	DOWN
ITM2A	-1.1171	3.31078	-13.9933	8.81403e-41	2.34911e-39	81.6456	DOWN
NDRG2	-1.04523	3.48065	-13.9914	9.01689e-41	2.39944e-39	81.623	DOWN
RAMP1	1.28066	2.87702	13.9849	9.73437e-41	2.58636e-39	81.5469	UP
SRPX	-1.00456	3.10934	-13.9753	1.09036e-40	2.88281e-39	81.4342	DOWN
CAV1	-1.12063	4.33263	-13.965	1.22952e-40	3.23418e-39	81.3149	DOWN
GREB1	1.24353	2.67229	13.9371	1.70704e-40	4.44258e-39	80.9889	UP
NPNT	1.28927	4.25909	13.9339	1.77263e-40	4.60281e-39	80.9514	UP
PRR15L	1.04872	4.64909	13.9324	1.80419e-40	4.68121e-39	80.9339	UP
CHI3L1	-1.50859	3.58702	-13.931	1.8342e-40	4.75548e-39	80.9175	DOWN
HSH2D	1.00416	2.19575	13.9081	2.39969e-40	6.17492e-39	80.6505	UP
KRT5	-2.14659	3.96613	-13.9013	2.5992e-40	6.66333e-39	80.5712	DOWN
GDF15	1.22118	2.45955	13.8182	6.868e-40	1.72586e-38	79.6059	UP
PREX1	1.07413	4.44988	13.7682	1.2306e-39	3.03239e-38	79.0265	UP
MIA	-1.11851	1.13186	-13.7223	2.0973e-39	5.12026e-38	78.4969	DOWN
CCND1	1.15369	6.21708	13.7158	2.26152e-39	5.5016e-38	78.422	UP
DGAT2	-1.09647	2.23504	-13.6988	2.75474e-39	6.66363e-38	78.226	DOWN
TPRG1	1.23589	1.86713	13.6454	5.1149e-39	1.22262e-37	77.6113	UP
TNNT1	1.5475	2.52561	13.6375	5.60616e-39	1.33911e-37	77.5202	UP
SAA2-SAA4	-1.20823	1.29323	-13.6063	8.03921e-39	1.91097e-37	77.1622	DOWN
TTC36	1.00924	1.87386	13.5849	1.02962e-38	2.42896e-37	76.9164	UP
VAV3	1.10135	4.24199	13.5627	1.32926e-38	3.11228e-37	76.6627	UP
GSTP1	-1.14205	6.01775	-13.5568	1.42276e-38	3.32213e-37	76.5952	DOWN
BCAS1	1.08512	1.86175	13.5294	1.95127e-38	4.52845e-37	76.2814	UP
TPSG1	1.00906	1.05847	13.4995	2.75053e-38	6.31499e-37	75.9404	UP
FAM234B	1.10506	3.21518	13.4469	5.02918e-38	1.1379e-36	75.3411	UP
MARCO	-1.05285	1.22864	-13.4454	5.11712e-38	1.15627e-36	75.3239	DOWN
KRT16	-1.6306	2.01105	-13.3994	8.66117e-38	1.9329e-36	74.8012	DOWN
KRT6B	-1.67016	2.48556	-13.3806	1.07448e-37	2.38239e-36	74.5871	DOWN
DSG3	-1.17937	1.3612	-13.2936	2.89296e-37	6.26065e-36	73.6035	DOWN
MATN2	-1.07485	2.37446	-13.2897	3.02567e-37	6.53071e-36	73.559	DOWN
BMPR1B-DT	1.00361	0.959682	13.2819	3.3062e-37	7.12349e-36	73.471	UP
CALB2	-1.29559	2.27448	-13.234	5.69524e-37	1.20217e-35	72.9309	DOWN
PI3	-1.47007	1.41751	-13.2056	7.85158e-37	1.6472e-35	72.6121	DOWN
SRARP	1.26907	2.07015	13.1297	1.84982e-36	3.80171e-35	71.7612	UP
SOD3	-1.10661	2.83808	-13.0953	2.72629e-36	5.56633e-35	71.3761	DOWN
C3	-1.03933	5.61341	-13.0764	3.37043e-36	6.82462e-35	71.1655	DOWN
GFRA1	1.74159	3.94962	13.0284	5.77759e-36	1.1569e-34	70.6304	UP
PPP1R1A	-1.19118	1.65147	-13.024	6.07355e-36	1.21404e-34	70.5808	DOWN
SCNN1A	1.08797	3.90379	12.9659	1.16376e-35	2.28364e-34	69.9352	UP
SAA2	-1.20836	1.63835	-12.9266	1.8042e-35	3.50827e-34	69.4999	DOWN
GPRC5A	1.09716	4.72561	12.8866	2.81486e-35	5.43039e-34	69.0583	UP
JCHAIN	-1.83691	5.60649	-12.8822	2.9567e-35	5.69122e-34	69.0095	DOWN
KCNN4	-1.04701	2.62725	-12.8495	4.25399e-35	8.10195e-34	68.6484	DOWN
KCNE4	1.30875	2.94505	12.8334	5.08328e-35	9.63857e-34	68.4716	UP
ACTG2	-1.49693	2.78322	-12.7845	8.74086e-35	1.63212e-33	67.9335	DOWN
SLPI	-1.77662	4.98106	-12.7399	1.42999e-34	2.64136e-33	67.4449	DOWN
CFB	1.14671	2.87277	12.7396	1.43471e-34	2.64865e-33	67.4416	UP
WIF1	-1.06732	0.817873	-12.738	1.46153e-34	2.69671e-33	67.4232	DOWN
CAPN8	1.17273	2.20931	12.7378	1.46348e-34	2.69886e-33	67.4219	UP
ECRG4	-1.09478	1.30128	-12.7071	2.05353e-34	3.74472e-33	67.0857	DOWN
SAA1	-1.87817	4.67158	-12.6685	3.14186e-34	5.65716e-33	66.6636	DOWN
CLDN8	-1.11986	1.99628	-12.6324	4.66817e-34	8.33106e-33	66.2706	DOWN
ATF3	-1.01944	3.15679	-12.5931	7.18271e-34	1.26346e-32	65.8429	DOWN
RNU6-813P	1.15457	1.30411	12.5363	1.33609e-33	2.31578e-32	65.227	UP
IRX1	-1.17304	1.82042	-12.4873	2.27755e-33	3.90806e-32	64.6977	DOWN
PRELP	-1.04103	3.09353	-12.4858	2.31451e-33	3.96752e-32	64.6817	DOWN
CCL18	-1.14317	1.79241	-12.4643	2.92434e-33	4.98548e-32	64.4496	DOWN
IGFBP2	1.0447	4.38605	12.3957	6.15378e-33	1.02816e-31	63.7114	UP
IGLV2-11	-1.64799	4.18475	-12.3895	6.57928e-33	1.09711e-31	63.645	DOWN
KRT17	-1.89809	4.37553	-12.3495	1.01339e-32	1.67682e-31	63.2164	DOWN
SLC27A2	1.08919	2.00718	12.2978	1.7697e-32	2.88647e-31	62.6632	UP
FHL1	-1.19169	2.84308	-12.2489	2.99032e-32	4.79304e-31	62.1428	DOWN
ASS1	-1.12306	4.54806	-12.2244	3.89169e-32	6.20878e-31	61.8814	DOWN
PHGDH	-1.03015	3.32821	-12.1628	7.51281e-32	1.18318e-30	61.2288	DOWN
SCUBE2	1.65504	4.16383	12.1313	1.052e-31	1.63946e-30	60.8949	UP
BMPR1B	1.78031	2.70454	12.0462	2.59786e-31	3.95689e-30	59.9981	UP
C19orf33	1.39918	3.49221	12.0302	3.076e-31	4.67478e-30	59.8305	UP
KCNJ3	1.47384	1.49306	11.9677	5.95926e-31	8.90281e-30	59.1746	UP
C4B	1.09505	2.75497	11.9192	9.93046e-31	1.46694e-29	58.6681	UP
GPX3	-1.18053	4.22842	-11.7966	3.58377e-30	5.14554e-29	57.3953	DOWN
GALNT6	1.04323	4.25873	11.7341	6.87061e-30	9.66251e-29	56.75	UP
IGHV4-61	-1.05478	1.6403	-11.7191	8.03512e-30	1.12495e-28	56.5947	DOWN
IGHV2-5	-1.24261	2.11363	-11.6897	1.09033e-29	1.51415e-28	56.292	DOWN
EN1	-1.0065	1.28959	-11.6757	1.25991e-29	1.74048e-28	56.1487	DOWN
RIMS4	1.14179	1.6485	11.6525	1.60238e-29	2.19852e-28	55.9103	UP
AFF3	1.10568	2.7892	11.6364	1.8918e-29	2.5822e-28	55.7457	UP
C4A	1.05094	2.66258	11.6354	1.91061e-29	2.60684e-28	55.7359	UP
FOLR1	-1.1864	1.7178	-11.6336	1.94783e-29	2.65656e-28	55.7167	DOWN
LAMB3	-1.08825	3.38115	-11.5949	2.90389e-29	3.90919e-28	55.3208	DOWN
AR	1.03747	3.46408	11.5824	3.30224e-29	4.42634e-28	55.1934	UP
SYT1	1.05661	1.49467	11.5301	5.64818e-29	7.47735e-28	54.6613	UP
CCL21	-1.3718	2.92619	-11.5131	6.7236e-29	8.85321e-28	54.4885	DOWN
IGKJ5	-1.00725	1.53686	-11.5106	6.90187e-29	9.07749e-28	54.4625	DOWN
IGHV4-39	-1.66843	4.4442	-11.4578	1.18454e-28	1.53209e-27	53.9271	DOWN
IGKV1-27	-1.40082	3.0629	-11.4216	1.71213e-28	2.18969e-27	53.5619	DOWN
IGKV1-5	-1.69245	5.30383	-11.4155	1.82241e-28	2.32467e-27	53.5001	DOWN
IGHV1-46	-1.41701	3.12224	-11.3543	3.39531e-28	4.2629e-27	52.8833	DOWN
CRABP2	1.14456	8.1055	11.3211	4.75074e-28	5.91489e-27	52.5504	UP
IGHV3-15	-1.56514	4.14003	-11.3157	5.01898e-28	6.2398e-27	52.496	DOWN
CAVIN2	-1.03524	1.93306	-11.2597	8.83023e-28	1.08019e-26	51.9361	DOWN
PLAAT4	1.00994	5.8789	11.167	2.24058e-27	2.68439e-26	51.0133	UP
ECM1	1.07206	4.18905	11.1607	2.38646e-27	2.85021e-26	50.9508	UP
CCNO	1.04316	2.05193	11.1385	2.9811e-27	3.54313e-26	50.7304	UP
CP	-1.27667	2.08945	-11.1377	3.00492e-27	3.56897e-26	50.7225	DOWN
MMP11	1.37061	4.77101	11.1242	3.43754e-27	4.0645e-26	50.5892	UP
CHAD	1.37595	2.95842	11.1208	3.55558e-27	4.19827e-26	50.5558	UP
PI16	-1.1547	1.6673	-11.1102	3.95259e-27	4.65423e-26	50.4509	DOWN
IGHV4-59	-1.52687	3.93284	-11.0822	5.22366e-27	6.09444e-26	50.1746	DOWN
IGLV2-14	-1.66578	5.27888	-11.0816	5.25352e-27	6.12511e-26	50.169	DOWN
IGHV2-70	-1.23121	2.10027	-11.0783	5.43141e-27	6.32822e-26	50.136	DOWN
IGKV4-1	-1.67739	5.42237	-11.021	9.59077e-27	1.10172e-25	49.5727	DOWN
CACNG4	1.25417	3.81953	10.9859	1.35794e-26	1.54644e-25	49.2282	UP
IGKV3-20	-1.63806	6.13635	-10.954	1.8606e-26	2.1035e-25	48.9162	DOWN
IGHV3-21	-1.54178	3.818	-10.8616	4.61875e-26	5.11387e-25	48.0156	DOWN
CHI3L2	-1.08429	2.47883	-10.7982	8.58285e-26	9.37283e-25	47.4019	DOWN
LEP	-1.20295	1.15873	-10.7822	1.00347e-25	1.09132e-24	47.2471	DOWN
IGHV5-51	-1.56798	4.50838	-10.7548	1.30975e-25	1.41187e-24	46.9833	DOWN
IGHV4-30-2	-1.22542	2.66229	-10.751	1.35903e-25	1.46315e-24	46.9467	DOWN
IGHV3-74	-1.30651	3.42811	-10.7393	1.52319e-25	1.63527e-24	46.8338	DOWN
DPT	-1.12809	4.08138	-10.6859	2.55638e-25	2.69721e-24	46.321	DOWN
IGLV1-44	-1.52146	4.23461	-10.673	2.89659e-25	3.04773e-24	46.1973	DOWN
ADAMTS15	1.00704	2.96603	10.6685	3.02442e-25	3.17832e-24	46.1546	UP
IGHV3-53	-1.0933	2.17283	-10.667	3.06965e-25	3.22487e-24	46.1399	DOWN
CYP2T1P	1.4978	3.19237	10.658	3.34845e-25	3.50703e-24	46.0538	UP
IGHV3-33	-1.36979	3.26775	-10.6028	5.70048e-25	5.87889e-24	45.527	DOWN
GP2	1.17137	1.82141	10.5864	6.67041e-25	6.8442e-24	45.3714	UP
IGHV4-34	-1.31187	3.37155	-10.5699	7.81528e-25	7.9953e-24	45.2146	DOWN
IGKV3-11	-1.5401	5.2521	-10.5591	8.67282e-25	8.84061e-24	45.1115	DOWN
IGKV1-16	-1.33163	3.35571	-10.5576	8.79836e-25	8.96325e-24	45.0973	DOWN
STC2	1.38883	5.01104	10.5498	9.47901e-25	9.63376e-24	45.0235	UP
DIO1	1.00811	1.40986	10.53	1.14563e-24	1.15747e-23	44.8359	UP
IGLV1-47	-1.47196	3.89493	-10.5231	1.2241e-24	1.23421e-23	44.7704	DOWN
IGLV2-8	-1.28129	3.27536	-10.5118	1.36353e-24	1.36996e-23	44.6636	DOWN
IGHV3-23	-1.5665	5.11324	-10.5105	1.38032e-24	1.38642e-23	44.6515	DOWN
IGHV1-18	-1.62005	4.4329	-10.4962	1.58271e-24	1.58138e-23	44.516	DOWN
IGKV1-6	-1.24916	3.08195	-10.4539	2.36795e-24	2.34072e-23	44.1172	DOWN
IGLV3-21	-1.52512	4.32905	-10.434	2.86199e-24	2.81448e-23	43.9296	DOWN
IGHV3-72	-1.0691	2.26667	-10.4326	2.89979e-24	2.8492e-23	43.9166	DOWN
SERPINA5	1.19838	3.05427	10.4131	3.4895e-24	3.40715e-23	43.7334	UP
IGHV1-69D	-1.39199	3.20037	-10.3996	3.96521e-24	3.86504e-23	43.6069	DOWN
IGKV1-17	-1.32896	3.33496	-10.3972	4.0581e-24	3.95445e-23	43.584	DOWN
IGHV3-49	-1.32417	3.10195	-10.3883	4.4124e-24	4.29117e-23	43.5012	DOWN
IGKV1-9	-1.33205	3.6622	-10.3789	4.82456e-24	4.68139e-23	43.4128	DOWN
IGLV6-57	-1.40254	3.30949	-10.3765	4.93578e-24	4.78255e-23	43.3902	DOWN
RBP4	-1.28302	2.14737	-10.3555	6.01974e-24	5.80498e-23	43.1937	DOWN
IGLV7-46	-1.14852	2.52093	-10.326	7.95175e-24	7.60605e-23	42.9183	DOWN
OXTR	-1.02359	1.81157	-10.2906	1.10842e-23	1.04853e-22	42.5896	DOWN
IGLV7-43	-1.08644	2.35307	-10.2861	1.15628e-23	1.09291e-22	42.5477	DOWN
IGLL5	-1.20908	3.04732	-10.2826	1.19601e-23	1.12921e-22	42.5143	DOWN
H1-2	1.02258	6.13576	10.2742	1.29302e-23	1.21846e-22	42.4371	UP
IGLV1-40	-1.48946	4.85135	-10.273	1.30788e-23	1.23178e-22	42.4258	DOWN
IGLV3-25	-1.52302	4.36402	-10.2585	1.49856e-23	1.40789e-22	42.2912	DOWN
IGHV3-11	-1.39246	3.53594	-10.257	1.51982e-23	1.42669e-22	42.2772	DOWN
CRABP1	-1.4459	2.3082	-10.2261	2.02937e-23	1.89104e-22	41.9911	DOWN
IGHV3-73	-1.18439	2.28809	-10.2257	2.03785e-23	1.89844e-22	41.987	DOWN
IGHJ3	-1.15463	2.58929	-10.2194	2.16157e-23	2.01096e-22	41.9287	DOWN
ADH1B	-1.37004	2.191	-10.1946	2.72391e-23	2.52113e-22	41.6999	DOWN
IGHV1-2	-1.42806	3.38438	-10.1534	3.99631e-23	3.65833e-22	41.3207	DOWN
HSPB6	-1.08641	2.51747	-10.1502	4.11819e-23	3.76487e-22	41.2909	DOWN
IGKV3-15	-1.34444	4.02869	-10.1466	4.25761e-23	3.88922e-22	41.258	DOWN
LINC00993	1.54846	3.62484	10.1315	4.8977e-23	4.45258e-22	41.1194	UP
IGLV5-45	-1.06494	1.98856	-10.1253	5.1897e-23	4.70682e-22	41.0621	DOWN
CEACAM5	1.21908	1.78265	10.1243	5.23873e-23	4.74877e-22	41.0528	UP
KRT14	-1.6787	4.11811	-10.0947	6.89177e-23	6.1932e-22	40.7815	DOWN
CD36	-1.19002	2.73885	-10.094	6.93313e-23	6.22548e-22	40.7756	DOWN
IGHV3-30	-1.38958	3.87886	-10.0848	7.55068e-23	6.76859e-22	40.6912	DOWN
IGHM	-1.55386	5.28268	-10.0179	1.3996e-22	1.23318e-21	40.0808	DOWN
IGKV3D-20	-1.02647	2.13413	-10.0012	1.63095e-22	1.42967e-21	39.9295	DOWN
IGLV2-23	-1.44141	4.63121	-9.99908	1.66355e-22	1.45676e-21	39.9099	DOWN
IGKC	-1.56364	7.43244	-9.98003	1.98134e-22	1.72492e-21	39.737	DOWN
IGLV1-51	-1.38902	4.59327	-9.97667	2.04332e-22	1.77708e-21	39.7065	DOWN
IGLV3-27	-1.05009	1.74835	-9.93737	2.9276e-22	2.52184e-21	39.3509	DOWN
G0S2	-1.19522	3.37236	-9.92737	3.20773e-22	2.75484e-21	39.2605	DOWN
IGLV3-19	-1.5025	4.64783	-9.924	3.30811e-22	2.83892e-21	39.23	DOWN
KRT81	-1.38692	2.22619	-9.92347	3.32412e-22	2.85123e-21	39.2252	DOWN
IGLV4-69	-1.30457	3.16301	-9.91356	3.63847e-22	3.10997e-21	39.1359	DOWN
PTN	-1.09299	3.20943	-9.88862	4.5667e-22	3.87249e-21	38.9112	DOWN
AQP5	-1.07331	1.43217	-9.86314	5.75719e-22	4.86278e-21	38.6821	DOWN
IGHV3-48	-1.1606	2.49531	-9.77991	1.22299e-21	1.01598e-20	37.9372	DOWN
S100A14	1.12758	6.43634	9.76466	1.40326e-21	1.1632e-20	37.8012	UP
IGKV2-24	-1.11341	2.73755	-9.75741	1.498e-21	1.24083e-20	37.7367	DOWN
S100A9	-1.5196	5.0357	-9.69724	2.5717e-21	2.10429e-20	37.2024	DOWN
IGLC2	-1.4388	6.47116	-9.68663	2.82808e-21	2.31022e-20	37.1085	DOWN
PGR	1.08109	2.23666	9.61707	5.26136e-21	4.21954e-20	36.4949	UP
EGR1	-1.02548	5.83651	-9.58368	7.07945e-21	5.63285e-20	36.2016	DOWN
IGHA1	-1.47526	7.90411	-9.46686	1.98609e-20	1.53331e-19	35.1822	DOWN
IGLC3	-1.4118	5.79905	-9.39157	3.84006e-20	2.91992e-19	34.5309	DOWN
SLC7A2	1.20817	3.65827	9.39123	3.85143e-20	2.92793e-19	34.528	UP
IGHV2-26	-1.08034	2.19603	-9.32134	7.07605e-20	5.3041e-19	33.9271	DOWN
ADIPOQ	-1.28332	2.09609	-9.30811	7.93602e-20	5.93445e-19	33.8139	DOWN
OLFM4	-1.07315	1.42927	-9.2651	1.15123e-19	8.53064e-19	33.4465	DOWN
IGLV8-61	-1.25725	2.8287	-9.23988	1.43096e-19	1.05261e-18	33.2317	DOWN
SYT13	1.10338	1.94247	9.21716	1.73989e-19	1.27276e-18	33.0386	UP
CIDEC	-1.18602	1.79913	-9.21	1.85033e-19	1.35096e-18	32.9779	DOWN
KRT23	-1.11734	3.28082	-9.20525	1.92741e-19	1.40515e-18	32.9376	DOWN
DSCAM-AS1	1.08175	1.35239	9.20016	2.01348e-19	1.46633e-18	32.8944	UP
GPD1	-1.1789	2.00089	-9.18835	2.22818e-19	1.61925e-18	32.7944	DOWN
S100A8	-1.3016	2.74515	-9.16633	2.69054e-19	1.94783e-18	32.6082	DOWN
IGLV3-10	-1.24242	3.10447	-9.15178	3.04718e-19	2.19814e-18	32.4853	DOWN
IGHV1-69	-1.04956	2.12017	-9.06481	6.38846e-19	4.51165e-18	31.7546	DOWN
IGHV1-24	-1.16011	2.97842	-9.04463	7.57957e-19	5.33307e-18	31.5858	DOWN
COMP	1.07793	4.29346	9.00355	1.07245e-18	7.47839e-18	31.2432	UP
TRARG1	-1.01121	1.43416	-8.9538	1.62978e-18	1.12337e-17	30.8302	DOWN
KRT15	-1.2077	3.39464	-8.87516	3.14562e-18	2.13111e-17	30.1814	DOWN
COL10A1	1.08822	4.20165	8.49645	6.97615e-17	4.32319e-16	27.1255	UP
MSMB	1.11361	2.27111	8.42791	1.20767e-16	7.3604e-16	26.5847	UP
PLIN1	-1.18149	2.4557	-8.36385	2.01006e-16	1.21087e-15	26.0828	DOWN
CEACAM6	1.32488	3.37045	8.33752	2.47594e-16	1.48163e-15	25.8774	UP
IGHA2	-1.31036	5.5796	-8.21176	6.6507e-16	3.88828e-15	24.9043	DOWN
SLITRK6	1.03552	2.45283	8.16527	9.5515e-16	5.53703e-15	24.5479	UP
FABP4	-1.37726	4.00127	-7.85383	1.03223e-14	5.61921e-14	22.2059	DOWN
CLEC3A	1.39902	1.90089	7.70532	3.12307e-14	1.64377e-13	21.1175	UP
CPB1	1.49067	2.26314	7.60416	6.57032e-14	3.37985e-13	20.3867	UP
PIGR	-1.01418	2.22309	-7.54093	1.04145e-13	5.30011e-13	19.9342	DOWN
PLIN4	-1.0182	2.60387	-7.21142	1.08815e-12	5.18832e-12	17.6313	DOWN
NPY1R	1.03866	3.26155	6.74902	2.51141e-11	1.08357e-10	14.5566	UP
IGHG1	-1.16119	6.37081	-6.57309	7.90396e-11	3.29261e-10	13.4356	DOWN
MUCL1	-1.31909	3.88175	-6.28292	4.94179e-10	1.95039e-09	11.6461	DOWN
LTF	-1.02168	5.18587	-5.39188	8.69174e-08	2.91119e-07	6.62187	DOWN
